# Supplementary material for: Genetic Alteration Profiles and Clinicopathological Associations in Atypical Parathyroid Adenoma
Source: Hindawi journal article supplement (doi:10.1155/2021/6666257), 2021-03-09
Supplement: f1 [file 6666257.f1.zip]

Supplemental Table 2: Details of all alterations in parathyroid tumors

| SNV NO.  | Gene   | Predicted Protein Variants                       | First Priority |
|----------|--------|--------------------------------------------------|----------------|
| SNV00048 | CDKN2A | L,CDKN2A:NM_001195132:exon2:c.G343T:p.V115L,C    | Second         |
| SNV00053 | EZH2   | 9Q,EZH2:NM_001203248:exon12:c.C1409A:p.P470Q,EZ  | First1         |
| SNV00054 | EZH2   | 6Q,EZH2:NM_001203248:exon7:c.G620A:p.R207Q,EZ    | First1         |
| SNV00003 | CDC73  | CDC73:NM_024529:exon1:c.3delG:p.M1fs             | First1         |
| SNV00004 | CDC73  | CDC73:NM_024529:exon1:c.9_18del:p.D3fs           | First1         |
| SNV00005 | CDC73  | CDC73:NM_024529:exon1:c.10delG:p.V4fs            | First1         |
| SNV00006 | CDC73  | CDC73:NM_024529:exon1:c.18delC:p.S6fs            | First1         |
| SNV00007 | CDC73  | CDC73:NM_024529:exon1:c.C25T:p.R9X               | First1         |
| SNV00008 | CDC73  | CDC73:NM_024529:exon1:c.45delG:p.K15fs           | First1         |
| SNV00009 | CDC73  | CDC73:NM_024529:exon1:c.G64T:p.G22X              | First1         |
| SNV00010 | CDC73  | CDC73:NM_024529:exon1:c.G70T:p.E24X              | First1         |
| SNV00011 | CDC73  | CDC73:NM_024529:exon1:c.82delG:p.G28fs           | First1         |
| SNV00012 | CDC73  | CDC73:NM_024529:exon1:c.84_90del:p.G28fs         | First1         |
| SNV00013 | CDC73  | CDC73:NM_024529:exon1:c.G85T:p.E29X              | First1         |
| SNV00014 | CDC73  | CDC73:NM_024529:exon1:c.104_118del:p.35_40del    | Second         |
| SNV00015 | CDC73  | CDC73:NM_024529:exon1:c.G128A:p.W43X             | First1         |
| SNV00016 | CDC73  | NM_024529:exon1:c.131+1G>C                       | First1         |
| SNV00017 | CDC73  | CDC73:NM_024529:exon2:c.G157T:p.E53X             | First1         |
| SNV00018 | CDC73  | CDC73:NM_024529:exon2:c.C162G:p.Y54X             | First1         |
| SNV00019 | CDC73  | CDC73:NM_024529:exon2:c.T163A:p.Y55N             | First1         |
| SNV00020 | CDC73  | CDC73:NM_024529:exon2:c.174dupT:p.D58fs          | First1         |
| SNV00021 | CDC73  | CDC73:NM_024529:exon2:c.T191C:p.L64P             | First1         |
| SNV00022 | CDC73  | CDC73:NM_024529:exon2:c.194_202del:p.65_68del    | First1         |
| SNV00023 | CDC73  | CDC73:NM_024529:exon2:c.C226T:p.R76X             | First1         |
| SNV00024 | CDC73  | CDC73:NM_024529:exon2:c.G232C:p.A78P             | First1         |
| SNV00025 | CDC73  | CDC73:NM_024529:exon3:c.259_260del:p.R87fs       | First1         |
| SNV00026 | CDC73  | CDC73:NM_024529:exon3:c.T293C:p.L98P             | First1         |
| SNV00027 | CDC73  | CDC73:NM_024529:exon4:c.C362T:p.S121F            | First1         |
| SNV00028 | CDC73  | CDC73:NM_024529:exon7:c.549delT:p.A183fs         | First1         |
| SNV00029 | CDC73  | CDC73:NM_024529:exon7:c.570delG:p.M190fs         | First1         |
| SNV00030 | CDC73  | CDC73:NM_024529:exon7:c.C664T:p.R222X            | First1         |
| SNV00031 | CDC73  | CDC73:NM_024529:exon8:c.753delA:p.A251fs         | First1         |
| SNV00032 | CDC73  | CDC73:NM_024529:exon8:c.G817A:p.A273T            | First1         |
| SNV00033 | CDC73  | CDC73:NM_024529:exon14:c.G1305A:p.M435I          | First1         |
| SNV00034 | CDC73  | CDC73:NM_024529:exon15:c.C1394A:p.S465X          | First1         |
| SNV00035 | MEN1   | 98L,MEN1:NM_130801:exon10:c.C1493T:p.P498L,ME    | First1         |
| SNV00036 | MEN1   | 65+6G>A;NM_130803:exon9:c.1365+6G>A;NM_13080     | First2         |
| SNV00037 | MEN1   | 54X,MEN1:NM_130801:exon9:c.G1360T:p.G454X,MEN    | First1         |
| SNV00038 | MEN1   | 54X,MEN1:NM_130801:exon7:c.C1060T:p.Q354X,MEN    | First1         |
| SNV00039 | MEN1   | 8fs,MEN1:NM_130801:exon3:c.503_510del:p.G168fs,M | First1         |
| SNV00040 | MEN1   | 45X,MEN1:NM_130804:exon3:c.133G>T:p.E45X,MEN     | First1         |
| SNV00042 | CDKN1B | CDKN1B:NM_004064:exon1:c.280delC:p.P94fs         | First1         |
| SNV00043 | HIC1   | 3202:exon2:c.G818A:p.S273N,HIC1:NM_006497:exon2: | First1         |

|          |      |                                                 |        |
|----------|------|-------------------------------------------------|--------|
| SNV00044 | HIC1 | kon2:c.1217C>T;p.A406V,HIC1:NM_001098202:exon2: | Third  |
| SNV00045 | HIC1 | 02:exon2:c.A1628G;p.K543R,HIC1:NM_006497:exon2: | First1 |
| SNV00046 | HIC1 | kon2:c.2002G>A;p.A668T,HIC1:NM_001098202:exon2: | First1 |
| SNV00052 | EZH2 | N,EZH2:NM_001203247:exon16:c.T1921A;p.Y641N,E2  | First1 |

| Calling Q | otyping Q | VCF Filter | Case_het               | Case_hom | Chrs | Position   | Ref Allele |
|-----------|-----------|------------|------------------------|----------|------|------------|------------|
| M         | 1         |            | 1037569,1173723,       |          | 9    | 2.2E+07    | C          |
| H         | 1         |            | 1095855,               |          | 7    | 1.5E+08    | G          |
| H         | 0.9516    |            | 1037008,               |          | 7    | 1.5E+08    | C          |
| M         | 1         |            | 1131735_18B0723A,      |          | 1    | 1333-1930  | G          |
| H         | 1         |            | 877208_A2,             |          | 1    | 1339-1930  | TGCTTA     |
| M         | 1         |            | 1028591_A3,            |          | 1    | 1340-1930  | G          |
| M         | 1         |            | 1046897_A1,            |          | 1    | 1348-1930  | C          |
| M         | 1         |            | 1143390_A2,            |          | 1    | 1.9E+08    | C          |
| H         | 1         |            | 876396_A2,876415_A2,   |          | 1    | 1375-1930  | G          |
| H         | 0.9846    |            | 860550_A1,             |          | 1    | 1.9E+08    | G          |
| M         | 0.9923    |            | 1177965_A6,            |          | 1    | 1.9E+08    | G          |
| M         | 1         |            | 972291_A2,             |          | 1    | 1412-1930  | G          |
| H         | 0.9923    |            | 1028838_A,             |          | 1    | 1414-1930  | GGAGTTG    |
| M         | 1         |            | 7_A2,1155717_A3,12862, |          | 1    | 1.9E+08    | G          |
| H         | 0.9923    |            | 1110788_A6,            |          | 1    | 1434-1930  | GAAGACG    |
| H         | 0.9923    |            | 935992_2,1172857_A2,   |          | 1    | 1.9E+08    | G          |
| H         | 0.9923    |            | 1016492_A4,            |          | 1    | 1.9E+08    | G          |
| H         | 1         |            | 1179941_A3,            |          | 1    | 1.9E+08    | G          |
| H         | 1         |            | 89_A3,1077285_F2,11404 |          | 1    | 1.9E+08    | C          |
| M         | 1         |            | 1069417_A4,            |          | 1    | 1.9E+08    | T          |
| H         | 1         |            | 972291_A2,             |          | 1    | 14283-1930 | -          |
| H         | 1         |            | 1095855_18B0723A,      |          | 1    | 1.9E+08    | T          |
| H         | 1         |            | 1209230_A3,            |          | 1    | 14304-1930 | TAAACGTG   |
| H         | 1         |            | 1012776_A3,            |          | 1    | 1.9E+08    | C          |
| M         | 0.9545    |            | 1009154_A3,            |          | 1    | 1.9E+08    | G          |
| H         | 1         |            | 876396_A2,876415_A2,   |          | 1    | 19325-1930 | AG         |
| H         | 1         |            | 867432_A,              |          | 1    | 1.9E+08    | T          |
| M         | 0.9922    |            | 935992_2,              |          | 1    | 1.9E+08    | C          |
| H         | 1         |            | 1143390_A2,            |          | 1    | 1016-1931  | T          |
| M         | 1         |            | 877208_A2,             |          | 1    | 1037-1931  | G          |
| H         | 1         |            | 1028591_A3,687917_B1,  |          | 1    | 1.9E+08    | C          |
| H         | 1         |            | 868167_A2,             |          | 1    | 17020-1931 | A          |
| M         | 1         |            | 1140404_A1,            |          | 1    | 1.9E+08    | G          |
| H         | 0.9923    |            | 700011_A4,             |          | 1    | 1.9E+08    | G          |
| H         | 1         |            | 1249519_A2,            |          | 1    | 1.9E+08    | C          |
| H         | 1         |            | 1171276,               |          | 11   | 6.5E+07    | G          |
| H         | 1         |            | 922715,                |          | 11   | 6.5E+07    | C          |
| M         | 0.9924    |            |                        | 938331,  | 11   | 6.5E+07    | C          |
| H         | 0.9924    |            | 1037569,               |          | 11   | 6.5E+07    | G          |
| H         | 1         |            | 1090119,               |          | 11   | 5522-6457  | CAGGCC     |
| H         | 0         |            | 1171276,               |          | 11   | 6.5E+07    | C          |
| H         | 0.9769    |            | 974439,                |          | 12   | 1053-1287  | C          |
| H         | 1         |            | 826080,                |          | 17   | 1960745    | G          |

|   |        |  |                         |  |    |         |   |
|---|--------|--|-------------------------|--|----|---------|---|
| M | 0      |  | 922715,                 |  | 17 | 1961201 | C |
| M | 0.8397 |  | 847204,1083561,876396,  |  | 17 | 1961555 | A |
| M | 1      |  | 876415,                 |  | 17 | 1961986 | G |
| H | 0.9924 |  | 3365,1083561,1037503,69 |  | 7  | 1.5E+08 | A |

| Alt Allele | Gene Region | Function               | Strand Orientation | Protein Variation | SNP ID             | q_Alts (1000G) | hg19 chr |
|------------|-------------|------------------------|--------------------|-------------------|--------------------|----------------|----------|
| A          | exonic      | nonsynonymous SNV      | -                  |                   | rs779913365        |                |          |
| T          | exonic      | nonsynonymous SNV      | -                  |                   |                    |                |          |
| T          | exonic      | nonsynonymous SNV      | -                  |                   | rs747028969        |                |          |
| -          | exonic      | frameshift deletion    | +                  |                   | rs1060500020       |                |          |
| -          | exonic      | frameshift deletion    | +                  |                   |                    |                |          |
| -          | exonic      | frameshift deletion    | +                  |                   |                    |                |          |
| -          | exonic      | frameshift deletion    | +                  |                   |                    |                |          |
| T          | exonic      | stopgain               | +                  |                   | rs4262(STR_around) |                |          |
| -          | exonic      | frameshift deletion    | +                  |                   |                    |                |          |
| T          | exonic      | stopgain               | +                  |                   |                    |                |          |
| T          | exonic      | stopgain               | +                  |                   |                    |                |          |
| -          | exonic      | frameshift deletion    | +                  |                   | rs587776560        |                |          |
| -          | exonic      | frameshift deletion    | +                  |                   |                    |                |          |
| T          | exonic      | stopgain               | +                  |                   | DEL_around)        |                |          |
| -          | exonic      | nonframeshift deletion | +                  |                   |                    |                |          |
| A          | exonic      | stopgain               | +                  |                   | rs121434263        |                |          |
| C          | splicing    |                        | +                  |                   |                    |                |          |
| T          | exonic      | stopgain               | +                  |                   |                    |                |          |
| G          | exonic      | stopgain               | +                  |                   | rs121434265        |                |          |
| A          | exonic      | nonsynonymous SNV      | +                  |                   |                    |                |          |
| T          | exonic      | frameshift insertion   | +                  |                   |                    |                |          |
| C          | exonic      | nonsynonymous SNV      | +                  |                   | rs121434264        |                |          |
| -          | exonic      | nonframeshift deletion | +                  |                   |                    |                |          |
| T          | exonic      | stopgain               | +                  |                   | rs886041158        |                |          |
| C          | exonic      | nonsynonymous SNV      | +                  |                   |                    |                |          |
| -          | exonic      | frameshift deletion    | +                  |                   |                    |                |          |
| C          | exonic      | nonsynonymous SNV      | +                  |                   |                    |                |          |
| T          | exonic      | nonsynonymous SNV      | +                  |                   |                    |                |          |
| -          | exonic      | frameshift deletion    | +                  |                   |                    |                |          |
| -          | exonic      | frameshift deletion    | +                  |                   |                    |                |          |
| T          | exonic      | stopgain               | +                  |                   |                    |                |          |
| -          | exonic      | frameshift deletion    | +                  |                   |                    |                |          |
| A          | exonic      | nonsynonymous SNV      | +                  |                   |                    |                |          |
| A          | exonic      | nonsynonymous SNV      | +                  |                   |                    |                |          |
| A          | exonic      | stopgain               | +                  |                   |                    |                |          |
| A          | exonic      | nonsynonymous SNV      | -                  |                   | rs766604600        |                |          |
| T          | splicing    |                        | -                  |                   | rs746077651        |                |          |
| A          | exonic      | stopgain               | -                  |                   |                    |                |          |
| A          | exonic      | stopgain               | -                  |                   |                    |                |          |
| -          | exonic      | frameshift deletion    | -                  |                   |                    |                |          |
| A          | exonic      | stopgain               | -                  |                   |                    |                |          |
| -          | exonic      | frameshift deletion    | +                  |                   |                    |                |          |
| A          | exonic      | nonsynonymous SNV      | +                  |                   |                    |                |          |

|   |        |                   |   |  |           |  |  |
|---|--------|-------------------|---|--|-----------|--|--|
| T | exonic | nonsynonymous SNV | + |  |           |  |  |
| G | exonic | nonsynonymous SNV | + |  |           |  |  |
| A | exonic | nonsynonymous SNV | + |  | 99114111  |  |  |
| T | exonic | nonsynonymous SNV | - |  | 267601395 |  |  |

[illegible]

|  |  |  |         |  |  |  |  |  |
|--|--|--|---------|--|--|--|--|--|
|  |  |  |         |  |  |  |  |  |
|  |  |  |         |  |  |  |  |  |
|  |  |  | 2.9E-05 |  |  |  |  |  |
|  |  |  |         |  |  |  |  |  |



| ConsSites | SIFT Score | FT Score P | PolyPhen V2 | POLYPHEN V2 Score Pred | MutationTas |
|-----------|------------|------------|-------------|------------------------|-------------|
| 9;Name=V  | 0.15       | T          | 0.826       | P                      | 0.575       |
|           | 0.366      | T          | 0.035       | B                      | 1           |
|           | 0.035      | D          | 0.943       | P                      | 0.998       |
|           |            |            |             |                        |             |
|           |            |            |             |                        |             |
|           |            |            |             |                        |             |
|           |            |            |             |                        | 1           |
|           |            |            |             |                        |             |
| ;Name=V   |            |            |             |                        | 1           |
| ;Name=V   |            |            |             |                        | 1           |
| 5;Name=V  |            |            |             |                        |             |
| 5;Name=V  |            |            |             |                        |             |
| 5;Name=V  |            |            |             |                        | 1           |
| 5;Name=V  |            |            |             |                        |             |
|           |            |            |             |                        | 1           |
|           |            |            |             |                        | 1           |
|           |            |            |             |                        | 1           |
|           |            |            |             |                        | 1           |
|           | 0          | D          | 1           | D                      | 1           |
|           |            |            |             |                        |             |
|           | 0.001      | D          | 0.999       | D                      | 1           |
|           |            |            |             |                        |             |
| Name=V\$  |            |            |             |                        | 1           |
| 9;Name=V  | 0.005      | D          | 1           | D                      | 1           |
|           |            |            |             |                        |             |
|           | 0          | D          | 1           | D                      | 1           |
|           | 0.044      | D          | 0.351       | B                      | 1           |
|           |            |            |             |                        |             |
| 4;Name=V  |            |            |             |                        |             |
| 1;Name=V  |            |            |             |                        | 1           |
| ;Name=V\$ |            |            |             |                        |             |
| ;Name=V\$ | 0.582      | T          | 0           | B                      | 0.97        |
|           | 0.336      | T          | 0.001       | B                      | 0.992       |
|           |            |            |             |                        | 1           |
|           | 0.305      | T          | 0.745       | P                      | 0.998       |
|           |            |            |             |                        |             |
|           |            |            |             |                        | 1           |
|           |            |            |             |                        | 1           |
| Name=V\$  |            |            |             |                        |             |
| Name=V\$  |            |            |             |                        | 1           |
| ;Name=V\$ |            |            |             |                        |             |
|           | 0.542      | T          | 0           | B                      | 1           |

|          |       |   |       |   |       |
|----------|-------|---|-------|---|-------|
| 8;Name=V | 0.457 | T | 0.827 | P | 0.959 |
| ;Name=V  | 0.312 | T | 0.989 | D | 1     |
| 0;Name=V | 0.003 | D | 0.197 | B | 1     |
| Name=V\$ | 0     | D | 0.998 | D | 1     |

| tionTaster | Cadd_Raw | Cadd_Phre | Dann  | Eigen   | V_ADA_N | V_RF_S | OMIM                          |
|------------|----------|-----------|-------|---------|---------|--------|-------------------------------|
| D          | 3.34673  | 22.9      | 0.982 | -0.4083 |         |        | er, multiple, (3); Pancreat   |
| D          | 2.0944   | 16.82     | 0.952 | 0.0481  |         |        | 1573 Weaver syndrome, 2       |
| D          | 4.58931  | 24.4      | 0.999 | 0.159   |         |        | 1573 Weaver syndrome, 2       |
|            |          |           |       |         |         |        | tumor syndrome, 145001        |
|            |          |           |       |         |         |        | tumor syndrome, 145001        |
|            |          |           |       |         |         |        | tumor syndrome, 145001        |
|            |          |           |       |         |         |        | tumor syndrome, 145001        |
| A          | 11.0718  | 37        | 0.997 | 0.72    |         |        | tumor syndrome, 145001        |
|            |          |           |       |         |         |        | tumor syndrome, 145001        |
| A          | 12.0687  | 38        | 0.995 | 1.1824  |         |        | tumor syndrome, 145001        |
| A          | 11.3774  | 37        | 0.996 | 0.8455  |         |        | tumor syndrome, 145001        |
|            |          |           |       |         |         |        | tumor syndrome, 145001        |
|            |          |           |       |         |         |        | tumor syndrome, 145001        |
| A          | 12.3716  | 39        | 0.996 | 1.1731  |         |        | tumor syndrome, 145001        |
|            |          |           |       |         |         |        | tumor syndrome, 145001        |
| A          | 10.4893  | 36        | 0.993 | 0.943   |         |        | tumor syndrome, 145001        |
| D          | 5.10071  | 25.3      | 0.995 | 1.0962  | 1       | 0.94   | tumor syndrome, 145001        |
| A          | 12.9906  | 40        | 0.998 | 1.2839  |         |        | tumor syndrome, 145001        |
| A          | 10.4471  | 36        | 0.997 | 0.7081  |         |        | tumor syndrome, 145001        |
| D          | 6.55299  | 31        | 0.992 | 0.9074  |         |        | tumor syndrome, 145001        |
|            |          |           |       |         |         |        | tumor syndrome, 145001        |
| A          | 6.09412  | 28.2      | 0.999 | 0.8127  |         |        | tumor syndrome, 145001        |
|            |          |           |       |         |         |        | tumor syndrome, 145001        |
| A          | 12.7298  | 40        | 0.998 | 0.7997  |         |        | tumor syndrome, 145001        |
| D          | 6.61626  | 32        | 0.998 | 1.0038  |         |        | tumor syndrome, 145001        |
|            |          |           |       |         |         |        | tumor syndrome, 145001        |
| D          | 6.20825  | 28.7      | 0.999 | 0.8781  |         |        | tumor syndrome, 145001        |
| D          | 3.83905  | 23.4      | 0.993 | 0.2209  |         |        | tumor syndrome, 145001        |
|            |          |           |       |         |         |        | tumor syndrome, 145001        |
|            |          |           |       |         |         |        | tumor syndrome, 145001        |
| A          | 12.2567  | 39        | 0.998 | 0.7367  |         |        | tumor syndrome, 145001        |
|            |          |           |       |         |         |        | tumor syndrome, 145001        |
| D          | 2.76974  | 21.2      | 0.967 | -0.1764 |         |        | tumor syndrome, 145001        |
| D          | 2.65394  | 20.5      | 0.956 | -0.2838 |         |        | tumor syndrome, 145001        |
| A          | 13.2175  | 41        | 0.994 | 1.0127  |         |        | tumor syndrome, 145001        |
| D          | 4.26484  | 23.9      | 0.995 | -0.2837 |         |        | nor of lung (3); Lipoma, s    |
|            | 1.72815  | 14.57     | 0.865 | 1.4956  | 0.0009  | 0.012  | nor of lung (3); Lipoma, s    |
| D          | 12.0968  | 38        | 0.991 | 0.8357  |         |        | nor of lung (3); Lipoma, s    |
| A          | 11.32    | 37        | 0.998 | 1.027   |         |        | nor of lung (3); Lipoma, s    |
|            |          |           |       |         |         |        | nor of lung (3); Lipoma, s    |
| A          | 10.5589  | 36        | 0.997 | 0.9838  |         |        | Parathyroid adenoma, sor      |
|            |          |           |       |         |         |        | multiple endocrine neoplasia, |
| N          | 1.18692  | 11.68     | 0.979 | -0.5027 |         |        | 17p13.3 603825                |

|   |         |       |       |         |  |  |                         |
|---|---------|-------|-------|---------|--|--|-------------------------|
| N | 2.01984 | 16.34 | 0.997 | -0.1876 |  |  | 17p13.3 603825          |
| D | 3.64685 | 23.2  | 0.988 | 0.0058  |  |  | 17p13.3 603825          |
| D | 4.39505 | 24.1  | 0.998 | -0.0435 |  |  | 17p13.3 603825          |
| D | 6.76401 | 32    | 0.985 | 1.07    |  |  | 1573 Weaver syndrome, 2 |

[illegible]

|                              |  |  |                              |
|------------------------------|--|--|------------------------------|
|                              |  |  |                              |
|                              |  |  |                              |
|                              |  |  |                              |
| equinovarus;Short ribs;Promi |  |  | ver syndrome;Weaver syndrome |

[illegible]

|                        |                                                     |  |
|------------------------|-----------------------------------------------------|--|
|                        |                                                     |  |
| Uncertain significance | , 0, 0, 0, 0, 0] PP=[0, 0, 0, 0, 0, 0] BA1=0 BS=[0, |  |
|                        |                                                     |  |
| Likely pathogenic      | , 0, 0, 0, 0, 0] PP=[0, 1, 1, 0, 1, 0] BA1=0 BS=[0, |  |



[illegible]

|                                              |  |            |             |         |             |
|----------------------------------------------|--|------------|-------------|---------|-------------|
| ing/vestibular/ear phenotype;MP:0005371 limb |  | ome 17p 1  |             |         | lar organis |
| ing/vestibular/ear phenotype;MP:0005371 limb |  | ome 17p 1  |             |         | lar organis |
| ing/vestibular/ear phenotype;MP:0005371 limb |  | ome 17p 1  |             |         | lar organis |
| 7/hematopoietic system phenotype;MP:000538   |  | eaver synd | skin),2(pam | MELA-AU | 71,histone  |

| GO_MF         | GO_CC      | GG_Pathway    | KING_SEQ | KING_SEQ | GOLOGY | Case(0 1 2) | t Allele Fr | 3086_gen |
|---------------|------------|---------------|----------|----------|--------|-------------|-------------|----------|
| or activity   | C9,cytosol | (human)       | CGATGC   | CGCACC   | 2      | 129 2 0     | 0.00763     | C/C      |
| 1490,chromasm | GO:0005575 | (human)       | GGAGTA   | GACTCTA  | 1      | 130 1 0     | 0.00382     | G/G      |
| 1490,chromasm | GO:0005575 | (human)       | TTCAA    | AAACAC   | 1      | 123 1 0     | 0.00403     | C/C      |
| or activity   | GO:0005575 |               | ggcgagg  | GACAGT   | 1      | 129 1 0     | 0.00385     |          |
| or activity   | GO:0005575 |               | GGCGAG   | AGAAGA   | 1      | 129 1 0     | 0.00385     |          |
| or activity   | GO:0005575 |               | GCGAGG   | CAACAT   | 1      | 129 1 0     | 0.00385     |          |
| or activity   | GO:0005575 |               | GGGGGG   | AGAAGA   | 1      | 129 1 0     | 0.00385     |          |
| or activity   | GO:0005575 |               | AAGATG   | GGAGAT   | 1      | 129 1 0     | 0.00385     |          |
| or activity   | GO:0005575 |               | GCGTCG   | GACGAA   | 1      | 128 2 0     | 0.00769     |          |
| or activity   | GO:0005575 |               | CATCCA   | GTTCTC   | 1      | 129 1 0     | 0.00385     |          |
| or activity   | GO:0005575 |               | GAAGAA   | CTGGCC   | 1      | 129 1 0     | 0.00385     |          |
| or activity   | GO:0005575 |               | TGTGGT   | TGTGAA   | 1      | 129 1 0     | 0.00385     |          |
| or activity   | GO:0005575 |               | TGGTGA   | CCAAC    | 1      | 129 1 0     | 0.00385     |          |
| or activity   | GO:0005575 |               | GGTGA    | GAAGAC   | 1      | 127 3 0     | 0.01154     |          |
| or activity   | GO:0005575 |               | ATCTTC   | GCATGG   | 0      | 129 1 0     | 0.00385     |          |
| or activity   | GO:0005575 |               | AAGAAT   | GGCCCA   | 1      | 128 2 0     | 0.00769     |          |
| or activity   | GO:0005575 |               | ATGTGA   | CAGGGG   | 1      | 129 1 0     | 0.00385     |          |
| or activity   | GO:0005575 |               | CAGGACT  | TTTATT   | 1      | 130 1 0     | 0.00382     |          |
| or activity   | GO:0005575 |               | TGGAA    | TTCTAC   | 1      | 124 7 0     | 0.02672     |          |
| or activity   | GO:0005575 |               | TGGAAC   | TCTACT   | 1      | 130 1 0     | 0.00382     |          |
| or activity   | GO:0005575 |               | GCCAAC   | AACGTG   | 1      | 131 1 0     | 0.00379     |          |
| or activity   | GO:0005575 |               | CTACAC   | CCTGTT   | 1      | 131 1 0     | 0.00379     |          |
| or activity   | GO:0005575 |               | CACATT   | CCGACG   | 1      | 131 1 0     | 0.00379     |          |
| or activity   | GO:0005575 |               | CGTGCA   | TTCAATT  | 1      | 131 1 0     | 0.00379     |          |
| or activity   | GO:0005575 |               | CCTTTC   | TTTACT   | 1      | 131 1 0     | 0.00379     |          |
| or activity   | GO:0005575 |               | GTTTTA   | CTTGGA   | 1      | 129 2 0     | 0.00763     |          |
| or activity   | GO:0005575 |               | CCTGAT   | CTTTT    | 1      | 130 1 0     | 0.00382     |          |
| or activity   | GO:0005575 |               | TGCTCC   | CATATT   | 1      | 128 1 0     | 0.00388     |          |
| or activity   | GO:0005575 |               | CTGAAG   | CTAAGA   | 1      | 131 1 0     | 0.00379     |          |
| or activity   | GO:0005575 |               | AAATTG   | GAGACTG  | 1      | 131 1 0     | 0.00379     |          |
| or activity   | GO:0005575 |               | TTTTGT   | AGTATG   | 1      | 130 2 0     | 0.00758     |          |
| or activity   | GO:0005575 |               | TTTAGA   | GAGAAG   | 1      | 131 1 0     | 0.00379     |          |
| or activity   | GO:0005575 |               | TGCAC    | TTACTG   | 1      | 131 1 0     | 0.00379     |          |
| or activity   | GO:0005575 |               | GAGTAG   | CTCTATA  | 1      | 129 1 0     | 0.00385     |          |
| or activity   | GO:0005575 |               | GTTTGA   | AGTAA    | 1      | 131 1 0     | 0.00379     |          |
| histone-lys   | reticulum  | regulation in | CTTGTC   | CCGCCG   | 1      | 130 1 0     | 0.00382     | G/G      |
| histone-lys   | reticulum  | regulation in | GTAGTG   | CTAGGG   | 1      | 130 1 0     | 0.00382     | C/C      |
| histone-lys   | reticulum  | regulation in | ACCTCT   | ACAAGA   | 1      | 130 0 1     | 0.00763     | C/C      |
| histone-lys   | reticulum  | regulation in | CAGGCC   | CAGGCC   | 1      | 130 1 0     | 0.00382     | G/G      |
| histone-lys   | reticulum  | regulation in | GGTGA    | GGAGCT   | 1      | 130 1 0     | 0.00382     | CCC/GCA  |
| histone-lys   | reticulum  | regulation in | ATGACC   | AGGAGC   | 1      | 123 1 0     | 0.00403     | C/C      |
| ming grow     | 31464,Cule | asles - Ho    | GCCCGA   | GCCGGC   | 1      | 129 1 0     | 0.00385     | C/C      |
| :0003700,     | oplasm GO  |               | CTGCCG   | GAGCCC   | 1      | 130 1 0     | 0.00382     | G/G      |

|          |          |           |        |        |   |         |         |     |
|----------|----------|-----------|--------|--------|---|---------|---------|-----|
| 0003700, | plasm GC |           | CTCGAG | GGTGAC | 1 | 130 1 0 | 0.00382 | C/C |
| 0003700, | plasm GC |           | CCCTAC | ACGCGC | 1 | 128 3 0 | 0.01145 | A/A |
| 0003700, | plasm GC |           | CACGCA | GGCCAA | 1 | 124 1 0 | 0.004   | G/G |
| 1490,chr | asm GO:0 | an) hsa05 | GGTTAT | TGCACA | 1 | 127 4 0 | 0.01527 | A/A |

[illegible]

|       |     |        |     |        |     |       |     |       |
|-------|-----|--------|-----|--------|-----|-------|-----|-------|
| 798:0 | C/C | 441:0  | C/C | 457:0  | C/C | 613:0 | C/C | 531:0 |
| 793:0 | A/A | 433:0  | A/A | 185:0  | A/A | 196:0 | A/A | 527:0 |
| 121:0 | G/G | 1611:0 | G/G | 1573:0 | G/G | 836:0 | G/G | 825:0 |
| 55:0  | A/A | 143:0  | A/A | 154:0  | A/A | 280:0 | A/A | 191:0 |

[illegible]

|     |       |     |       |     |        |     |        |     |
|-----|-------|-----|-------|-----|--------|-----|--------|-----|
| C/C | 170:0 | C/C | 321:0 | C/C | 568:0  | C/C | 504:0  | C/C |
| A/A | 87:0  | A/A | 155:0 | A/A | 314:0  | A/A | 159:0  | A/A |
| G/G | 712:0 | G/G | 431:0 | G/G | 1374:0 | G/G | 1124:0 | G/G |
| A/A | 159:0 | A/A | 266:0 | A/A | 280:0  | A/A | 98:0   | A/A |



[illegible]

|       |     |       |     |       |     |       |     |        |
|-------|-----|-------|-----|-------|-----|-------|-----|--------|
| 509:0 | C/C | 292:0 | C/C | 527:0 | C/C | 463:0 | C/C | 635:0  |
| 184:0 | A/A | 283:0 | A/A | 417:0 | A/A | 316:0 | A/A | 417:0  |
| 860:0 | G/G | 989:0 | G/G | 798:0 | G/G | 682:0 | G/G | 1679:0 |
| 59:0  | A/A | 34:0  | A/A | 190:0 | A/A | 167:0 | A/A | 195:0  |

[illegible]

|     |       |     |       |     |       |     |        |     |
|-----|-------|-----|-------|-----|-------|-----|--------|-----|
| C/C | 365:0 | C/C | 416:0 | C/C | 309:0 | C/C | 511:0  | C/C |
| A/A | 357:0 | A/A | 410:0 | A/A | 302:0 | A/A | 4495:0 | A/A |
| G/G | 799:0 | G/G | 731:0 | G/G | 902:0 | G/G | 866:0  | G/G |
| A/A | 221:0 | A/A | 356:0 | A/A | 114:0 | A/A | 125:0  | A/A |

[illegible]

|        |     |        |     |        |     |       |     |       |
|--------|-----|--------|-----|--------|-----|-------|-----|-------|
| 493:0  | C/C | 332:0  | C/C | 345:0  | C/C | 253:0 | C/C | 253:0 |
| 237:0  | A/A | 328:0  | A/A | 2106:0 | A/A | 111:0 | A/A | 73:0  |
| 1150:0 | G/G | 1412:0 | G/G | 512:0  | G/G | 785:0 | G/G | 541:0 |
| 177:0  | A/A | 51:0   | A/A | 43:0   | A/A | 78:0  | A/A | 20:0  |

[illegible]

|     |        |     |       |     |       |     |        |     |
|-----|--------|-----|-------|-----|-------|-----|--------|-----|
| C/C | 480:0  | C/C | 354:0 | C/C | 432:0 | C/C | 576:0  | C/C |
| A/A | 293:0  | A/A | 205:0 | A/A | 320:0 | A/A | 7931:0 | A/A |
| G/G | 1199:0 | G/G | 305:0 | G/G | 326:0 | G/G | 76:0   | G/G |
| A/A | 181:0  | A/A | 293:0 | A/A | 281:0 | A/A | 329:0  | A/A |



[illegible]

|       |     |       |     |       |     |       |     |        |
|-------|-----|-------|-----|-------|-----|-------|-----|--------|
| 316:0 | C/C | 655:0 | C/C | 530:0 | C/C | 283:0 | C/C | 227:0  |
| 151:0 | A/A | 246:0 | A/A | 302:0 | A/A | 280:0 | A/G | 464:78 |
| 544:0 | G/G | 733:0 | G/G | 668:0 | G/G | 462:0 | G/G | 141:0  |
| 73:0  | A/A | 294:0 | A/A | 165:0 | A/A | 92:0  | A/A | 70:0   |

[illegible]

|     |       |     |        |     |       |     |        |     |
|-----|-------|-----|--------|-----|-------|-----|--------|-----|
| C/C | 267:0 | C/C | 616:0  | C/C | 330:0 | C/C | 760:0  | C/C |
| A/A | 267:0 | A/A | 3752:0 | A/A | 65:0  | A/A | 4186:0 | A/A |
| G/G | 744:0 | G/G | 737:0  | G/G | 450:0 | G/G | 884:0  | G/G |
| A/A | 120:0 | A/A | 33:0   | A/A | 34:0  | A/A | 46:0   | A/A |

[illegible]

|        |     |        |     |       |     |        |     |        |
|--------|-----|--------|-----|-------|-----|--------|-----|--------|
| 622:0  | C/C | 341:0  | C/C | 209:0 | C/C | 350:0  | C/C | 423:0  |
| 481:0  | A/A | 134:0  | A/A | 94:0  | A/A | 135:0  | A/A | 116:0  |
| 1252:0 | G/G | 1564:0 | G/G | 843:0 | G/G | 1412:0 | G/G | 1594:0 |
| 123:0  | A/A | 49:0   | A/A | 60:0  | A/A | 67:0   | A/A | 63:0   |

[illegible]

|     |        |     |        |     |       |     |        |     |
|-----|--------|-----|--------|-----|-------|-----|--------|-----|
| C/C | 361:0  | C/C | 442:0  | C/C | 507:0 | C/C | 454:0  | C/C |
| A/A | 358:0  | A/A | 441:0  | A/A | 300:0 | A/A | 251:0  | A/A |
| G/G | 2136:0 | G/G | 1773:0 | G/G | 887:0 | G/G | 1019:0 | G/G |
| A/A | 77:0   | A/A | 129:0  | A/A | 181:0 | A/A | 200:0  | A/A |



[illegible]

|        |     |        |     |        |     |        |     |        |
|--------|-----|--------|-----|--------|-----|--------|-----|--------|
| 644:0  | C/C | 479:0  | C/C | 568:0  | C/C | 311:0  | C/C | 422:0  |
| 624:0  | A/A | 159:0  | A/A | 564:0  | A/A | 171:0  | A/A | 417:0  |
| 2481:0 | G/G | 1571:0 | G/G | 3090:0 | G/G | 2592:0 | G/G | 1054:0 |
| 172:0  | A/A | 112:0  | A/A | 58:0   | A/A | 104:0  | A/A | 143:0  |

[illegible]

|  |  |  |  |  |  |  |  |  |
|--|--|--|--|--|--|--|--|--|
|  |  |  |  |  |  |  |  |  |
|  |  |  |  |  |  |  |  |  |
|  |  |  |  |  |  |  |  |  |
|  |  |  |  |  |  |  |  |  |

[illegible]

|  |  |  |  |  |  |  |  |  |
|--|--|--|--|--|--|--|--|--|
|  |  |  |  |  |  |  |  |  |
|  |  |  |  |  |  |  |  |  |
|  |  |  |  |  |  |  |  |  |
|  |  |  |  |  |  |  |  |  |

[illegible]

|  |  |  |  |  |  |  |  |  |
|--|--|--|--|--|--|--|--|--|
|  |  |  |  |  |  |  |  |  |
|  |  |  |  |  |  |  |  |  |
|  |  |  |  |  |  |  |  |  |
|  |  |  |  |  |  |  |  |  |



[illegible]

|  |  |  |  |  |  |  |  |  |
|--|--|--|--|--|--|--|--|--|
|  |  |  |  |  |  |  |  |  |
|  |  |  |  |  |  |  |  |  |
|  |  |  |  |  |  |  |  |  |
|  |  |  |  |  |  |  |  |  |

[illegible]

|  |  |  |  |  |  |  |  |  |
|--|--|--|--|--|--|--|--|--|
|  |  |  |  |  |  |  |  |  |
|  |  |  |  |  |  |  |  |  |
|  |  |  |  |  |  |  |  |  |
|  |  |  |  |  |  |  |  |  |

[illegible]

|  |  |  |  |  |  |  |  |  |
|--|--|--|--|--|--|--|--|--|
|  |  |  |  |  |  |  |  |  |
|  |  |  |  |  |  |  |  |  |
|  |  |  |  |  |  |  |  |  |
|  |  |  |  |  |  |  |  |  |

[illegible]

|  |  |  |  |  |  |  |  |  |
|--|--|--|--|--|--|--|--|--|
|  |  |  |  |  |  |  |  |  |
|  |  |  |  |  |  |  |  |  |
|  |  |  |  |  |  |  |  |  |
|  |  |  |  |  |  |  |  |  |



[illegible]

|  |  |  |  |  |  |  |  |  |
|--|--|--|--|--|--|--|--|--|
|  |  |  |  |  |  |  |  |  |
|  |  |  |  |  |  |  |  |  |
|  |  |  |  |  |  |  |  |  |
|  |  |  |  |  |  |  |  |  |

[illegible]

|  |  |  |  |  |  |  |  |  |
|--|--|--|--|--|--|--|--|--|
|  |  |  |  |  |  |  |  |  |
|  |  |  |  |  |  |  |  |  |
|  |  |  |  |  |  |  |  |  |
|  |  |  |  |  |  |  |  |  |

[illegible]

|  |  |  |  |  |  |  |  |  |
|--|--|--|--|--|--|--|--|--|
|  |  |  |  |  |  |  |  |  |
|  |  |  |  |  |  |  |  |  |
|  |  |  |  |  |  |  |  |  |
|  |  |  |  |  |  |  |  |  |

[illegible]

|  |  |  |  |  |  |  |  |  |
|--|--|--|--|--|--|--|--|--|
|  |  |  |  |  |  |  |  |  |
|  |  |  |  |  |  |  |  |  |
|  |  |  |  |  |  |  |  |  |
|  |  |  |  |  |  |  |  |  |



[illegible]

|  |  |  |  |  |  |  |  |  |
|--|--|--|--|--|--|--|--|--|
|  |  |  |  |  |  |  |  |  |
|  |  |  |  |  |  |  |  |  |
|  |  |  |  |  |  |  |  |  |
|  |  |  |  |  |  |  |  |  |

[illegible]

|  |  |  |  |  |  |  |  |  |
|--|--|--|--|--|--|--|--|--|
|  |  |  |  |  |  |  |  |  |
|  |  |  |  |  |  |  |  |  |
|  |  |  |  |  |  |  |  |  |
|  |  |  |  |  |  |  |  |  |

[illegible]

|  |  |  |  |  |  |  |  |  |
|--|--|--|--|--|--|--|--|--|
|  |  |  |  |  |  |  |  |  |
|  |  |  |  |  |  |  |  |  |
|  |  |  |  |  |  |  |  |  |
|  |  |  |  |  |  |  |  |  |

[illegible]

|  |  |  |  |  |  |  |  |  |
|--|--|--|--|--|--|--|--|--|
|  |  |  |  |  |  |  |  |  |
|  |  |  |  |  |  |  |  |  |
|  |  |  |  |  |  |  |  |  |
|  |  |  |  |  |  |  |  |  |



[illegible]

|  |  |  |  |  |  |  |  |  |
|--|--|--|--|--|--|--|--|--|
|  |  |  |  |  |  |  |  |  |
|  |  |  |  |  |  |  |  |  |
|  |  |  |  |  |  |  |  |  |
|  |  |  |  |  |  |  |  |  |

[illegible]

|  |  |  |  |  |  |  |  |  |
|--|--|--|--|--|--|--|--|--|
|  |  |  |  |  |  |  |  |  |
|  |  |  |  |  |  |  |  |  |
|  |  |  |  |  |  |  |  |  |
|  |  |  |  |  |  |  |  |  |

[illegible]

|  |  |  |  |  |  |  |  |  |
|--|--|--|--|--|--|--|--|--|
|  |  |  |  |  |  |  |  |  |
|  |  |  |  |  |  |  |  |  |
|  |  |  |  |  |  |  |  |  |
|  |  |  |  |  |  |  |  |  |

[illegible]

|  |  |  |  |  |  |  |  |  |
|--|--|--|--|--|--|--|--|--|
|  |  |  |  |  |  |  |  |  |
|  |  |  |  |  |  |  |  |  |
|  |  |  |  |  |  |  |  |  |
|  |  |  |  |  |  |  |  |  |



[illegible]

|  |  |  |  |  |  |  |  |  |
|--|--|--|--|--|--|--|--|--|
|  |  |  |  |  |  |  |  |  |
|  |  |  |  |  |  |  |  |  |
|  |  |  |  |  |  |  |  |  |
|  |  |  |  |  |  |  |  |  |

[illegible]

|  |  |  |  |  |  |  |  |  |
|--|--|--|--|--|--|--|--|--|
|  |  |  |  |  |  |  |  |  |
|  |  |  |  |  |  |  |  |  |
|  |  |  |  |  |  |  |  |  |
|  |  |  |  |  |  |  |  |  |





[illegible]

|     |        |     |       |     |        |     |        |     |
|-----|--------|-----|-------|-----|--------|-----|--------|-----|
| C/C | 506:0  | C/C | 360:0 | C/C | 427:0  | C/C | 224:0  | C/C |
| A/A | 266:0  | A/A | 349:0 | A/A | 5908:0 | A/A | 2017:0 | A/A |
| G/G | 1340:0 | G/G | 708:0 | G/G | 566:0  | G/G | 146:0  | G/G |
| A/A | 46:0   | A/A | 220:0 | A/A | 297:0  | A/A | 36:0   | A/A |



[illegible]

|       |     |        |     |        |     |       |     |       |
|-------|-----|--------|-----|--------|-----|-------|-----|-------|
| 386:0 | C/C | 360:0  | C/C | 541:0  | C/C | 286:0 | C/C | 481:0 |
| 303:0 | A/A | 236:0  | A/A | 4434:0 | A/A | 73:0  | A/A | 137:0 |
| 590:0 | G/G | 1109:0 | G/G | 1666:0 | G/G | 968:0 | G/G | 566:0 |
| 417:0 | A/A | 227:0  | A/T | 193:65 | A/A | 54:0  | A/A | 75:0  |

[illegible]

|     |       |     |          |     |       |     |       |     |
|-----|-------|-----|----------|-----|-------|-----|-------|-----|
| C/C | 551:0 | C/C | 272:0    | C/C | 500:0 | C/C | 473:0 | C/C |
| A/A | 184:0 | A/G | 1494:163 | A/A | 268:0 | A/A | 471:0 | A/A |
| G/G | 851:0 | G/G | 344:0    | G/G | 359:0 | G/G | 787:0 | G/G |
| A/A | 180:0 | A/T | 20:16    | A/A | 233:0 | A/A | 173:0 | A/A |

[illegible]

|        |     |        |     |       |     |       |     |       |
|--------|-----|--------|-----|-------|-----|-------|-----|-------|
| 448:0  | C/C | 340:0  | C/C | 585:0 | C/C | 462:0 | C/C | 325:0 |
| 5277:0 | A/A | 335:0  | A/A | 244:0 | A/A | 457:0 | A/A | 316:0 |
| 518:0  | G/G | 1627:0 | G/G | 817:0 | G/G | 520:0 | G/G | 856:0 |
| 139:0  | A/A | 45:0   | A/A | 257:0 | A/A | 220:0 | A/A | 150:0 |

[illegible]

|     |       |     |       |     |       |     |        |     |
|-----|-------|-----|-------|-----|-------|-----|--------|-----|
| C/C | 524:0 | C/C | 627:0 | C/C | 600:0 | C/C | 633:0  | C/C |
| A/A | 292:0 | A/A | 251:0 | A/A | 596:0 | A/A | 265:0  | A/A |
| G/G | 179:0 | G/G | 753:0 | G/G | 764:0 | G/G | 3342:0 | G/G |
| A/A | 329:0 | A/A | 195:0 | A/A | 217:0 | A/A | 39:0   | A/A |



[illegible]

|        |     |       |     |       |     |       |     |        |
|--------|-----|-------|-----|-------|-----|-------|-----|--------|
| 525:0  | C/C | 614:0 | C/C | 545:0 | C/C | 517:0 | C/C | 398:0  |
| 4804:0 | A/A | 249:0 | A/A | 337:0 | A/A | 319:0 | A/A | 4877:0 |
| 487:0  | G/G | 330:0 | G/G | 386:0 | G/G | 200:0 | G/G | 426:0  |
| 180:0  | A/A | 342:0 | A/A | 248:0 | A/A | 181:0 | A/A | 210:0  |

[illegible]

|     |       |     |       |     |       |     |        |     |
|-----|-------|-----|-------|-----|-------|-----|--------|-----|
| C/C | 527:0 | C/C | 666:0 | C/C | 389:0 | C/C | 461:0  | C/C |
| A/A | 167:0 | A/A | 657:0 | A/A | 182:0 | A/A | 6693:0 | A/A |
| G/G | 745:0 | G/G | 939:0 | G/G | 264:0 | G/G | 102:0  | G/G |
| A/A | 164:0 | A/A | 57:0  | A/A | 289:0 | A/A | 332:0  | A/A |

[illegible]

|        |     |        |     |       |     |       |     |        |
|--------|-----|--------|-----|-------|-----|-------|-----|--------|
| 369:0  | C/C | 333:0  | C/C | 255:0 | C/C | 312:0 | C/C | 464:0  |
| 6028:0 | A/A | 5197:0 | A/A | 251:0 | A/A | 311:0 | A/A | 449:0  |
| 204:0  | G/G | 89:0   | G/G | 390:0 | G/G | 139:0 | G/G | 1044:0 |
| 169:0  | A/A | 485:0  | A/A | 97:0  | A/A | 159:0 | A/A | 93:0   |

[illegible]

|     |       |     |        |     |        |     |       |     |
|-----|-------|-----|--------|-----|--------|-----|-------|-----|
| C/C | 303:0 | C/C | 408:0  | C/C | 376:0  | C/C | 169:0 | C/T |
| A/A | 152:0 | A/A | 404:0  | A/A | 152:0  | A/A | 166:0 | A/A |
| G/G | 498:0 | G/G | 1389:0 | G/G | 1123:0 | G/G | 893:0 | G/G |
| A/A | 115:0 | A/A | 134:0  | A/A | 41:0   | A/A | 30:0  | A/A |



[illegible]

|        |     |        |     |       |     |        |     |       |
|--------|-----|--------|-----|-------|-----|--------|-----|-------|
| 130:16 | C/C | 230:0  | C/C | 679:0 | C/C | 184:0  | C/C | 83:0  |
| 998:0  | A/A | 1587:0 | A/A | 196:0 | A/A | 1291:0 | A/A | 441:0 |
| 230:0  | G/G | 865:0  |     |       | G/G | 453:0  | G/G | 175:0 |
| 26:0   | A/A | 24:0   | A/A | 183:0 | A/A | 32:0   | A/A | 24:0  |

| 69110_gen | 69110_rea | 72291_gen | 72291_rea | 80268_gen | 80268_rea | 90451_gen | 90451_rea | 808_A2_g |
|-----------|-----------|-----------|-----------|-----------|-----------|-----------|-----------|----------|
| C/C       | 2059:0    | C/C       | 1905:0    | C/C       | 1643:0    | C/C       | 1727:0    |          |
| G/G       | 887:0     | G/G       | 1337:0    | G/G       | 1710:0    | G/G       | 1601:0    |          |
| C/C       | 42:0      | C/C       | 66:0      | C/C       | 29:0      | C/C       | 46:0      |          |
|           |           |           |           |           |           |           |           | G/G      |
|           |           |           |           |           |           |           |           | AGC/CGT  |
|           |           |           |           |           |           |           |           | G/G      |
|           |           |           |           |           |           |           |           | C/C      |
|           |           |           |           |           |           |           |           | C/C      |
|           |           |           |           |           |           |           |           | G/G      |
|           |           |           |           |           |           |           |           | G/G      |
|           |           |           |           |           |           |           |           | G/G      |
|           |           |           |           |           |           |           |           | TTC/GGA  |
|           |           |           |           |           |           |           |           | G/G      |
|           |           |           |           |           |           |           |           | ACT/ATC  |
|           |           |           |           |           |           |           |           | G/G      |
|           |           |           |           |           |           |           |           | G/G      |
|           |           |           |           |           |           |           |           | G/G      |
|           |           |           |           |           |           |           |           | C/G      |
|           |           |           |           |           |           |           |           | T/T      |
|           |           |           |           |           |           |           |           | -/-      |
|           |           |           |           |           |           |           |           | T/T      |
|           |           |           |           |           |           |           |           | TGC/ATA  |
|           |           |           |           |           |           |           |           | C/C      |
|           |           |           |           |           |           |           |           | G/G      |
|           |           |           |           |           |           |           |           | AG/AG    |
|           |           |           |           |           |           |           |           | T/T      |
|           |           |           |           |           |           |           |           | C/C      |
|           |           |           |           |           |           |           |           | T/T      |
|           |           |           |           |           |           |           |           | G/G      |
|           |           |           |           |           |           |           |           | C/C      |
|           |           |           |           |           |           |           |           | A/A      |
|           |           |           |           |           |           |           |           | G/G      |
|           |           |           |           |           |           |           |           | G/G      |
|           |           |           |           |           |           |           |           | C/C      |
| G/G       | 284:0     | G/G       | 228:0     | G/G       | 89:0      | G/G       | 77:0      |          |
| C/C       | 1124:0    | C/C       | 1258:0    | C/C       | 787:0     | C/C       | 1008:0    |          |
| C/C       | 1124:0    | C/C       | 1258:0    | C/C       | 787:0     | C/C       | 1008:0    |          |
| G/G       | 503:0     | G/G       | 927:0     | G/G       | 645:0     | G/G       | 946:0     |          |
| CCC/GCA   | 42:0      | CCC/GCA   | 76:0      | CCC/GCA   | 112:0     | CCC/GCA   | 212:0     |          |
| C/C       | 45:0      | C/C       | 267:0     | C/C       | 94:0      | C/C       | 155:0     |          |
| C/C       | 252:0     | C/C       | 403:0     | C/C       | 250:0     | C/C       | 387:0     |          |
| G/G       | 467:0     | G/G       | 167:0     | G/G       | 177:0     | G/G       | 220:0     |          |

|     |       |     |        |     |        |     |        |  |
|-----|-------|-----|--------|-----|--------|-----|--------|--|
| C/C | 622:0 | C/C | 517:0  | C/C | 412:0  | C/C | 363:0  |  |
| A/A | 613:0 | A/A | 167:0  | A/A | 178:0  | A/A | 218:0  |  |
|     |       | G/G | 1262:0 | G/G | 2467:0 | G/G | 1621:0 |  |
| A/A | 128:0 | A/A | 251:0  | A/A | 93:0   | A/A | 214:0  |  |

[illegible]

|  |  |  |  |  |  |  |  |  |
|--|--|--|--|--|--|--|--|--|
|  |  |  |  |  |  |  |  |  |
|  |  |  |  |  |  |  |  |  |
|  |  |  |  |  |  |  |  |  |
|  |  |  |  |  |  |  |  |  |

[illegible]

|  |  |  |  |  |  |  |  |  |
|--|--|--|--|--|--|--|--|--|
|  |  |  |  |  |  |  |  |  |
|  |  |  |  |  |  |  |  |  |
|  |  |  |  |  |  |  |  |  |
|  |  |  |  |  |  |  |  |  |



[illegible]

|  |  |  |  |  |  |  |  |  |
|--|--|--|--|--|--|--|--|--|
|  |  |  |  |  |  |  |  |  |
|  |  |  |  |  |  |  |  |  |
|  |  |  |  |  |  |  |  |  |
|  |  |  |  |  |  |  |  |  |

[illegible]

|  |  |  |  |  |  |  |  |  |
|--|--|--|--|--|--|--|--|--|
|  |  |  |  |  |  |  |  |  |
|  |  |  |  |  |  |  |  |  |
|  |  |  |  |  |  |  |  |  |
|  |  |  |  |  |  |  |  |  |

[illegible]

|  |  |  |  |  |  |  |  |  |
|--|--|--|--|--|--|--|--|--|
|  |  |  |  |  |  |  |  |  |
|  |  |  |  |  |  |  |  |  |
|  |  |  |  |  |  |  |  |  |
|  |  |  |  |  |  |  |  |  |

[illegible]

|  |  |  |  |  |  |  |  |  |
|--|--|--|--|--|--|--|--|--|
|  |  |  |  |  |  |  |  |  |
|  |  |  |  |  |  |  |  |  |
|  |  |  |  |  |  |  |  |  |
|  |  |  |  |  |  |  |  |  |



[illegible]

|  |  |  |  |  |  |  |  |  |
|--|--|--|--|--|--|--|--|--|
|  |  |  |  |  |  |  |  |  |
|  |  |  |  |  |  |  |  |  |
|  |  |  |  |  |  |  |  |  |
|  |  |  |  |  |  |  |  |  |

| 912_B2_g | 912_B2_r | 517_C2_g | 517_C2_r | 05746_ge | 05746_rea | 08008_ge | 08008_rea | 08625_ge |
|----------|----------|----------|----------|----------|-----------|----------|-----------|----------|
|          |          |          |          | C/C      | 2883:0    | C/C      | 2082:0    | C/C      |
|          |          |          |          | G/G      | 1622:0    | G/G      | 1001:0    | G/G      |
|          |          |          |          | C/C      | 45:0      | C/C      | 23:0      | C/C      |
| G/G      | 6354:0   | G/G      | 2066:0   |          |           |          |           |          |
| AGC/CGT  | 6354:0   | AGC/CGT  | 2066:0   |          |           |          |           |          |
| G/G      | 6354:0   | G/G      | 2066:0   |          |           |          |           |          |
| C/C      | 6354:0   | C/C      | 2066:0   |          |           |          |           |          |
| C/C      | 6354:0   | C/C      | 2066:0   |          |           |          |           |          |
| G/G      | 6354:0   | G/G      | 2066:0   |          |           |          |           |          |
| G/G      | 6354:0   | G/G      | 2066:0   |          |           |          |           |          |
| G/G      | 6354:0   | G/G      | 2066:0   |          |           |          |           |          |
| G/G      | 6354:0   | G/G      | 2066:0   |          |           |          |           |          |
| TTC/GGA  | 6354:0   | TTC/GGA  | 2066:0   |          |           |          |           |          |
| G/G      | 6354:0   | G/G      | 2066:0   |          |           |          |           |          |
| ACT/ATC  | 6354:0   | ACT/ATC  | 2066:0   |          |           |          |           |          |
| G/G      | 6354:0   | G/G      | 2066:0   |          |           |          |           |          |
| G/G      | 6354:0   | G/G      | 2066:0   |          |           |          |           |          |
| G/G      | 3491:0   | G/G      | 3154:0   |          |           |          |           |          |
| C/C      | 3491:0   | C/G      | 3547:749 |          |           |          |           |          |
| T/T      | 3491:0   | T/T      | 3156:0   |          |           |          |           |          |
| -/-      | 3491:0   | -/-      | 3156:0   |          |           |          |           |          |
| T/T      | 3491:0   | T/T      | 3156:0   |          |           |          |           |          |
| TGC/ATA  | 3491:0   | TGC/ATA  | 3156:0   |          |           |          |           |          |
| C/C      | 3491:0   | C/C      | 3156:0   |          |           |          |           |          |
| G/G      | 3491:0   | G/G      | 3156:0   |          |           |          |           |          |
| AG/AG    | 817:0    | AG/AG    | 281:0    |          |           |          |           |          |
| T/T      | 817:0    | T/T      | 281:0    |          |           |          |           |          |
| C/C      | 684:0    | C/C      | 921:0    |          |           |          |           |          |
| T/T      | 2554:0   | T/T      | 2794:0   |          |           |          |           |          |
| G/G      | 2554:0   | G/G      | 2794:0   |          |           |          |           |          |
| C/C      | 2554:0   | C/C      | 2794:0   |          |           |          |           |          |
| A/A      | 595:0    | A/A      | 293:0    |          |           |          |           |          |
| G/G      | 595:0    | G/G      | 293:0    |          |           |          |           |          |
| G/G      | 865:0    | G/G      | 1571:0   |          |           |          |           |          |
| C/C      | 4321:0   | C/C      | 4507:0   |          |           |          |           |          |
|          |          |          |          | G/G      | 118:0     | G/G      | 89:0      | G/G      |
|          |          |          |          | C/C      | 813:0     | C/C      | 465:0     | C/C      |
|          |          |          |          | C/C      | 813:0     | C/C      | 465:0     | C/C      |
|          |          |          |          | G/G      | 818:0     | G/G      | 582:0     | G/G      |
|          |          |          |          | CCC/GCA  | 204:0     | CCC/GCA  | 92:0      | CCC/GCA  |
|          |          |          |          | C/C      | 28:0      | C/C      | 26:0      | C/C      |
|          |          |          |          | C/C      | 319:0     | C/C      | 152:0     | C/C      |
|          |          |          |          | G/G      | 287:0     | G/G      | 182:0     | G/G      |

|  |  |  |  |     |       |     |       |     |
|--|--|--|--|-----|-------|-----|-------|-----|
|  |  |  |  | C/C | 924:0 | C/C | 667:0 | C/C |
|  |  |  |  | A/A | 240:0 | A/A | 182:0 | A/A |
|  |  |  |  | G/G | 805:0 | G/G | 154:0 | G/G |
|  |  |  |  | A/A | 72:0  | A/A | 42:0  | A/A |

[illegible]

|       |     |        |     |        |     |        |     |        |
|-------|-----|--------|-----|--------|-----|--------|-----|--------|
| 894:0 | C/C | 931:0  | C/C | 800:0  | C/C | 782:0  | C/C | 993:0  |
| 265:0 | A/A | 927:0  | A/A | 7655:0 | A/A | 6968:0 | A/A | 169:0  |
| 100:0 | G/G | 210:0  | G/G | 48:0   | G/G | 31:0   | G/G | 1374:0 |
| 118:0 | A/T | 128:19 | A/A | 81:0   | A/A | 39:0   | A/A | 98:0   |

[illegible]

|     |        |     |        |     |       |     |       |     |
|-----|--------|-----|--------|-----|-------|-----|-------|-----|
| C/C | 668:0  | C/C | 1093:0 | C/C | 849:0 | C/C | 806:0 | C/C |
| A/A | 8087:0 | A/A | 1086:0 | A/A | 845:0 | A/A | 249:0 | A/A |
| G/G | 29:0   | G/G | 252:0  |     |       | G/G | 13:0  | G/G |
| A/A | 103:0  | A/A | 37:0   | A/A | 114:0 | A/A | 170:0 | A/A |



[illegible]

|        |     |        |     |        |     |        |     |        |
|--------|-----|--------|-----|--------|-----|--------|-----|--------|
| 1058:0 | C/C | 588:0  | C/C | 879:0  | C/C | 1109:0 | C/C | 1046:0 |
| 77:0   | A/A | 5098:0 | A/A | 6831:0 | A/A | 1103:0 | A/A | 292:0  |
| 59:0   |     |        | G/G | 10:0   | G/G | 26:0   | G/G | 203:0  |
| 53:0   | A/A | 30:0   | A/A | 112:0  | A/A | 43:0   | A/A | 64:0   |

[illegible]

|     |       |     |        |     |       |     |        |     |
|-----|-------|-----|--------|-----|-------|-----|--------|-----|
| C/C | 914:0 | C/C | 1176:0 | C/C | 952:0 | C/C | 785:0  | C/C |
| A/A | 68:0  | A/A | 132:0  | A/A | 437:0 | A/A | 8173:0 | A/A |
| G/G | 55:0  | G/G | 90:0   | G/G | 486:0 | G/G | 156:0  | G/G |
| A/A | 28:0  | A/A | 93:0   | A/A | 95:0  | A/A | 44:0   | A/A |

[illegible]

|        |     |        |     |        |     |       |     |        |
|--------|-----|--------|-----|--------|-----|-------|-----|--------|
| 835:0  | C/C | 535:0  | C/C | 559:0  | C/C | 397:0 | C/C | 262:0  |
| 244:0  | A/A | 6299:0 | A/A | 7517:0 | A/A | 71:0  | A/A | 3948:0 |
| 1057:0 |     |        | G/G | 10:0   | G/G | 94:0  |     |        |
| 84:0   | A/A | 120:0  | A/A | 134:0  | A/T | 6:18  | A/A | 38:0   |

[illegible]

|     |       |     |       |     |          |     |        |     |
|-----|-------|-----|-------|-----|----------|-----|--------|-----|
| C/C | 976:0 | C/C | 183:0 | C/C | 838:0    | C/C | 717:0  | C/C |
| A/A | 173:0 | A/A | 795:0 | A/G | 4067:547 | A/A | 3263:0 | A/A |
| G/G | 484:0 | G/G | 11:0  | G/G | 15:0     | G/A | 9:5    | G/G |
| A/A | 37:0  | A/A | 46:0  | A/A | 34:0     | A/A | 41:0   | A/A |



[illegible]

|       |     |        |  |
|-------|-----|--------|--|
| 702:0 | C/C | 1012:0 |  |
| 126:0 | A/A | 220:0  |  |
| 403:0 | G/G | 445:0  |  |
| 34:0  | A/A | 54:0   |  |
