# Supplementary material for: Genetic Alteration Profiles and Clinicopathological Associations in Atypical Parathyroid Adenoma
Source: Hindawi journal article supplement (doi:10.1155/2021/6666257), 2021-03-09
Supplement: f1 [file 6666257.f1.zip]

Supplemental Table 1. Read depth and quality assessment of the targeted sequencing data in each lesion

| Sample | Clean Reads | Raw Reads | Clean Reads Ratio | Q20    | Q30    |
|--------|-------------|-----------|-------------------|--------|--------|
| 1      | 482961      | 514131    | 0.94              | 99.94% | 93.31% |
| 2      | 349353      | 384125    | 0.91              | 99.94% | 93.06% |
| 3      | 426184      | 464916    | 0.92              | 99.93% | 93.05% |
| 4      | 185602      | 213441    | 0.87              | 99.92% | 93.52% |
| 5      | 451763      | 493119    | 0.92              | 99.94% | 93.58% |
| 6      | 371074      | 406961    | 0.91              | 99.93% | 92.85% |
| 7      | 282541      | 316453    | 0.89              | 99.95% | 93.12% |
| 8      | 470111      | 507406    | 0.93              | 99.93% | 93.41% |
| 9      | 350609      | 387205    | 0.91              | 99.93% | 93.06% |
| 10     | 391911      | 425891    | 0.92              | 99.93% | 93.19% |
| 11     | 452093      | 494333    | 0.91              | 99.94% | 93.19% |
| 12     | 478422      | 510026    | 0.94              | 99.94% | 92.82% |
| 13     | 412340      | 450184    | 0.92              | 99.94% | 93.13% |
| 14     | 196480      | 247546    | 0.79              | 99.94% | 92.53% |
| 15     | 407986      | 444105    | 0.92              | 99.94% | 92.67% |
| 16     | 268428      | 292755    | 0.92              | 99.94% | 92.94% |
| 17     | 394959      | 438617    | 0.9               | 99.94% | 93.14% |
| 18     | 318633      | 351149    | 0.91              | 99.92% | 93.18% |
| 19     | 492944      | 528802    | 0.93              | 99.94% | 93.24% |
| 20     | 446003      | 486930    | 0.92              | 99.94% | 92.69% |
| 21     | 271317      | 306118    | 0.89              | 99.94% | 92.82% |
| 22     | 500088      | 534596    | 0.94              | 99.95% | 93.23% |
| 23     | 358311      | 387369    | 0.92              | 99.94% | 92.50% |
| 24     | 418367      | 454049    | 0.92              | 99.94% | 92.80% |
| 25     | 432436      | 482818    | 0.9               | 99.95% | 93.72% |
| 26     | 200452      | 226971    | 0.88              | 99.91% | 93.62% |
| 27     | 175379      | 214420    | 0.82              | 99.94% | 92.64% |
| 28     | 466168      | 505210    | 0.92              | 99.93% | 93.47% |
| 29     | 113525      | 139922    | 0.81              | 99.91% | 93.30% |
| 30     | 229671      | 260156    | 0.88              | 99.94% | 93.12% |
| 31     | 211324      | 249275    | 0.85              | 99.94% | 93.14% |
| 32     | 412930      | 470029    | 0.88              | 99.94% | 93.72% |
| 33     | 385355      | 425269    | 0.91              | 99.94% | 93.62% |
| 34     | 418725      | 448088    | 0.93              | 99.97% | 86.31% |
| 35     | 205903      | 233624    | 0.88              | 99.98% | 85.56% |
| 36     | 433459      | 469456    | 0.92              | 99.97% | 86.26% |
| 37     | 422736      | 462595    | 0.91              | 99.97% | 85.94% |
| 38     | 414952      | 455717    | 0.91              | 99.97% | 85.76% |
| 39     | 381192      | 412789    | 0.92              | 99.97% | 86.03% |
| 40     | 453203      | 484366    | 0.94              | 99.97% | 86.74% |
| 41     | 471910      | 508322    | 0.93              | 99.97% | 86.03% |
| 42     | 427337      | 466173    | 0.92              | 99.97% | 86.19% |
| 43     | 174420      | 208250    | 0.84              | 99.96% | 86.03% |
| 44     | 459408      | 498610    | 0.92              | 99.97% | 86.72% |

|    |        |        |      |        |        |
|----|--------|--------|------|--------|--------|
| 45 | 458623 | 500458 | 0.92 | 99.97% | 85.47% |
| 46 | 482873 | 520288 | 0.93 | 99.98% | 86.04% |
| 47 | 459053 | 497943 | 0.92 | 99.97% | 86.21% |
| 48 | 361547 | 401786 | 0.9  | 99.95% | 86.23% |
| 49 | 389120 | 421385 | 0.92 | 99.97% | 85.23% |
| 50 | 338840 | 379492 | 0.89 | 99.98% | 85.73% |
| 51 | 235619 | 260530 | 0.9  | 99.97% | 85.94% |
| 52 | 266839 | 303198 | 0.88 | 99.97% | 85.44% |
| 53 | 497214 | 535001 | 0.93 | 99.98% | 85.14% |
| 54 | 318902 | 343598 | 0.93 | 99.97% | 86.18% |
| 55 | 499321 | 536949 | 0.93 | 99.97% | 86.37% |
| 56 | 506109 | 549191 | 0.92 | 99.98% | 85.40% |
| 57 | 219228 | 262141 | 0.84 | 99.97% | 85.95% |
| 58 | 384304 | 426694 | 0.9  | 99.98% | 85.94% |
| 59 | 470168 | 509342 | 0.92 | 99.97% | 86.37% |
| 60 | 391176 | 430073 | 0.91 | 99.97% | 84.88% |
| 61 | 444686 | 478849 | 0.93 | 99.97% | 85.08% |
| 62 | 436087 | 477005 | 0.91 | 99.97% | 86.19% |
| 63 | 457518 | 495702 | 0.92 | 99.97% | 86.71% |
| 64 | 470337 | 512968 | 0.92 | 99.98% | 85.58% |
| 65 | 318412 | 359810 | 0.88 | 99.98% | 86.17% |
| 66 | 382481 | 422598 | 0.91 | 99.98% | 86.08% |
| 67 | 439921 | 480187 | 0.92 | 99.97% | 86.70% |
| 68 | 378156 | 414616 | 0.91 | 99.97% | 86.01% |
| 69 | 219083 | 248137 | 0.88 | 99.97% | 85.89% |
| 70 | 419207 | 461139 | 0.91 | 99.97% | 85.82% |
| 71 | 446879 | 489513 | 0.91 | 99.97% | 85.44% |
| 72 | 224122 | 256887 | 0.87 | 99.97% | 85.14% |
| 73 | 430934 | 473840 | 0.91 | 99.97% | 86.42% |
| 74 | 481843 | 518751 | 0.93 | 99.97% | 86.75% |
| 75 | 518988 | 559439 | 0.93 | 99.98% | 86.04% |
| 76 | 472234 | 515836 | 0.92 | 99.97% | 86.36% |
| 77 | 467866 | 505436 | 0.93 | 99.97% | 86.82% |
| 78 | 487844 | 525489 | 0.93 | 99.97% | 86.92% |
| 79 | 458089 | 499773 | 0.92 | 99.95% | 85.88% |
| 80 | 506918 | 549068 | 0.92 | 99.97% | 86.55% |
| 81 | 414754 | 452372 | 0.92 | 99.97% | 85.95% |
| 82 | 417675 | 458807 | 0.91 | 99.97% | 86.11% |
| 83 | 509305 | 549506 | 0.93 | 99.97% | 86.26% |
| 84 | 390270 | 431249 | 0.9  | 99.97% | 85.60% |
| 85 | 413140 | 447206 | 0.92 | 99.97% | 86.44% |
| 86 | 526563 | 565088 | 0.93 | 99.97% | 86.63% |
| 87 | 477974 | 520425 | 0.92 | 99.97% | 86.25% |
| 88 | 355559 | 383107 | 0.93 | 99.98% | 80.47% |
| 89 | 497147 | 531491 | 0.94 | 99.97% | 86.66% |
| 90 | 540462 | 580906 | 0.93 | 99.97% | 86.07% |
| 91 | 409080 | 453643 | 0.9  | 99.98% | 86.12% |
| 92 | 442268 | 481908 | 0.92 | 99.97% | 86.67% |

|     |        |        |      |        |        |
|-----|--------|--------|------|--------|--------|
| 93  | 480670 | 519005 | 0.93 | 99.97% | 86.38% |
| 94  | 395234 | 436214 | 0.91 | 99.97% | 87.25% |
| 95  | 468420 | 509815 | 0.92 | 99.97% | 85.98% |
| 96  | 206696 | 223014 | 0.93 | 99.97% | 86.29% |
| 97  | 247496 | 267648 | 0.92 | 99.96% | 86.61% |
| 98  | 219415 | 237004 | 0.93 | 99.97% | 86.09% |
| 99  | 371027 | 409414 | 0.91 | 99.97% | 86.33% |
| 100 | 170477 | 200811 | 0.85 | 99.97% | 85.42% |
| 101 | 315645 | 348371 | 0.91 | 99.98% | 86.12% |
| 102 | 221514 | 255435 | 0.87 | 99.97% | 86.26% |
| 103 | 153148 | 176586 | 0.87 | 99.97% | 86.42% |
| 104 | 234564 | 267962 | 0.88 | 99.98% | 86.63% |
| 105 | 399006 | 440504 | 0.91 | 99.97% | 86.09% |
| 106 | 348553 | 388061 | 0.9  | 99.97% | 86.23% |
| 107 | 375579 | 416326 | 0.9  | 99.97% | 85.22% |
| 108 | 270100 | 305122 | 0.89 | 99.97% | 85.90% |
| 109 | 278046 | 311873 | 0.89 | 99.98% | 85.51% |
| 110 | 355430 | 393135 | 0.9  | 99.98% | 85.58% |
| 111 | 303796 | 342472 | 0.89 | 99.97% | 86.62% |
| 112 | 82921  | 105082 | 0.79 | 99.98% | 86.31% |
| 113 | 389560 | 431049 | 0.9  | 99.97% | 85.80% |
| 114 | 144562 | 178496 | 0.81 | 99.98% | 85.54% |
| 115 | 318586 | 351768 | 0.91 | 99.97% | 86.37% |
| 116 | 453390 | 490606 | 0.92 | 99.98% | 85.26% |
| 117 | 340412 | 380353 | 0.89 | 99.97% | 86.38% |
| 118 | 406471 | 448791 | 0.91 | 99.98% | 86.06% |
| 119 | 476392 | 517404 | 0.92 | 99.97% | 86.48% |
| 120 | 113921 | 144675 | 0.79 | 99.97% | 85.79% |
| 121 | 531183 | 569092 | 0.93 | 99.97% | 86.40% |
| 122 | 103117 | 123488 | 0.84 | 99.98% | 85.88% |
| 123 | 409825 | 449480 | 0.91 | 99.97% | 85.91% |
| 124 | 435369 | 473348 | 0.92 | 99.98% | 86.31% |
| 125 | 432625 | 471043 | 0.92 | 99.97% | 86.51% |
| 126 | 318156 | 351467 | 0.91 | 99.97% | 85.82% |
| 127 | 409606 | 451174 | 0.91 | 99.97% | 85.92% |
| 128 | 404551 | 447606 | 0.9  | 99.97% | 85.49% |
| 129 | 378651 | 409840 | 0.92 | 99.98% | 86.36% |
| 130 | 398116 | 431010 | 0.92 | 99.97% | 85.34% |
| 131 | 375097 | 400614 | 0.94 | 99.97% | 86.19% |
