# Supplementary material for: Genetic Alteration Profiles and Clinicopathological Associations in Atypical Parathyroid Adenoma
Source: Int J Genomics. 2021 Mar 9;2021:6666257. doi: 10.1155/2021/6666257 (PMC7969847; doi:10.1155/2021/6666257)
Supplement: Supplementary 1 — Supplemental Figure 1 Sanger sequencing results of all alterations in the parathyroid tumor samples. [file 6666257.f1.zip]

Archive with 4 entries (4 files):
- Supplemental Table 1 (1).pdf
- Supplemental Table 2 (1).pdf
- Supplemental Table 3 (1).docx
- Supplemental Table 4 (1).docx
